## RESEARCH ARTICLE

## Prevalence, associated factors, and comorbidities of tinnitus in adolescents

Jihye Rhee<sup>1</sup>, Dongwook Lee<sup>2</sup>, Myung Whan Suh<sup>3</sup>, Jun Ho Lee<sup>3,4</sup>, Yun-Chul Hong<sup>2</sup>, Seung Ha Oh<sup>3,4</sup>, Moo Kyun Park<sup>3,4\*</sup>

**1** Department of Otorhinolaryngology, Veterans Health Service Medical Center, Seoul, Korea, **2** Department of Preventive Medicine, Seoul National University College of Medicine, Seoul, Korea, **3** Department of Otorhinolaryngology-Head and Neck Surgery, Seoul National University Hospital, Seoul National University College of Medicine, Seoul, Korea, **4** Sensory Organ Research Institute, Seoul National University Medical Research Center, Seoul, Republic of Korea

✉ These authors contributed equally to this work.

\* [aseptic@snu.ac.kr](mailto:aseptic@snu.ac.kr)

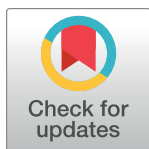

## OPEN ACCESS

**Citation:** Rhee J, Lee D, Suh MW, Lee JH, Hong Y-C, Oh SH, et al. (2020) Prevalence, associated factors, and comorbidities of tinnitus in adolescents. PLoS ONE 15(7): e0236723. <https://doi.org/10.1371/journal.pone.0236723>

**Editor:** Jae-Jun Song, Korea University Medical College, REPUBLIC OF KOREA

**Received:** March 31, 2020

**Accepted:** July 11, 2020

**Published:** July 31, 2020

**Copyright:** © 2020 Rhee et al. This is an open access article distributed under the terms of the [Creative Commons Attribution License](https://creativecommons.org/licenses/by/4.0/), which permits unrestricted use, distribution, and reproduction in any medium, provided the original author and source are credited.

**Data Availability Statement:** All relevant data are within the paper and its Supporting Information files.

**Funding:** Initials of the authors who received each award: S.H.O Financial Disclosure: 1. Korean society of otolaryngology-head and neck surgery Grant number: 2016KORL0645 URL: <http://www.korl.or.kr/> Role: The funders had no role in study design, data collection and analysis, decision to publish, or preparation of the manuscript. 2. Korean otology society Grant number: N/A URL: <http://www.otologicalsociety.or.kr/> Role: The

## Abstract

The aim of this study was to investigate the prevalence of tinnitus among adolescents, and the factors known or hypothesized to be associated with tinnitus. Based on random sampling of school types and regions, a nationwide hearing survey of the first-year middle and high school students of South Korea was performed. The subjects underwent an otologic examination followed by pure tone audiometry up to 8 kHz. Questionnaires about the factors associated with hearing and tinnitus were completed by the students and their parents. Among the 1,593 subjects who completed the questionnaire and underwent pure tone audiometry, the prevalence of tinnitus was 46.0% and that of severe tinnitus was 9.1%. Tinnitus was associated with age, female gender, history of ear infection and sinusitis, leisure noise exposure due to karaoke and local-area-network gaming, alcohol consumption, and cigarette smoking. Noticeable hearing loss was not detected but participants with tinnitus complained of difficulty with sound localization, hearing in noise, and verbal working memory and were more susceptible to fatigue. The subjects with tinnitus also suffered more physical and mental health problems than did those without tinnitus. Thus, protection of the ears from noise and appropriate counseling should be considered for adolescents with tinnitus.

## Introduction

Tinnitus is defined as the sensation of sound without external stimulation. It is one of the common symptoms in auditory system. [1] Most people suffer from tinnitus at least once in their life. About 30% of the general population experience tinnitus and about 10–15% have chronic tinnitus that requires medical evaluation. About 6% of tinnitus cases are considered severe. [2] However, tinnitus in adolescents has not been investigated extensively. The prevalence of tinnitus in adolescents varies from 4.7% to 74.9% according to the definition of tinnitus and the study design and population. [3] Because adolescents seldom complain of tinnitus spontaneously, most studies have been retrospective or not nationwide. Therefore, the above-mentioned prevalence of tinnitus among adolescents could be an underestimate.

fundings had no role in study design, data collection and analysis, decision to publish, or preparation of the manuscript.

**Competing interests:** The authors have declared that no competing interests exist.

**Abbreviations:** PTA, pure tone audiometry; HP, hearing performance; LNE, leisure noise exposure; LAN, local area network.

The factors associated with, and the comorbidities of, tinnitus in adolescents are unclear. Tinnitus is related to hearing loss or noise exposure. [4, 5] A hearing examination is crucial for the evaluation of tinnitus. Tinnitus could be related to auditory neuroplasticity after noise exposure. However, the association between hearing loss and noise exposure is unclear. Tinnitus is significantly associated with a poor quality of life, sleep disturbance, absence from work, and learning difficulty. [6–8] Moreover, tinnitus can degrade the understanding of speech in noise [9] and sound localization. [10] Patients with tinnitus show a variety of somatization symptoms and tinnitus could be related to psycho-emotional problems such as anxiety and depression. [8] Knowledge of the associated factors and comorbidities of tinnitus is important for providing appropriate management to patients.

We investigated the prevalence, severity, associated factors, and comorbid conditions of tinnitus in a nationwide hearing survey of middle- and high-school students by means of pure-tone audiometry (PTA), a hearing performance (HP) questionnaire, and a history of leisure noise exposure (LNE), and by evaluating socioeconomic, physical health, and mental health factors.

## Materials and methods

### Study design and subjects

We designed a nationwide cross-sectional survey of first-year middle (12–13 years old) and high (15–16 years old) school students based on random sampling of single-gender, coeducational, general, and vocational schools in eight metropolitan and eight suburban regions. The sampling protocol was described previously. [11] After a pilot study, which showed 50% agreement on the part of schools to participate in the survey, we listed 248 from 5,587 schools in Korea. The number of participants in each school was 25, based on the average number of students per class. The target class was carefully selected to be representative of the characteristics of the school. Two types of written informed consent were provided individually, to the students and their parents. Only the students their parents, who had both agreed to participate in the survey, were evaluated. Among the participants, those who had conductive hearing loss and/or any abnormalities in an otologic examination were excluded. The study was approved by the Institutional Review Board of Seoul National University Hospital (No. 1604-086-755). It was conducted in accordance with the principles that have their origin in the Declaration of Helsinki.

### Data collection

As tinnitus is a subjective symptom, no objective instruments are available for its measurement. Therefore, questionnaires were chosen with reference to previously reported epidemiological research on tinnitus. [12, 13] The questionnaires provided to the participants included two questions regarding tinnitus: (1) the presence or absence of tinnitus and (2) the degree of tinnitus. Those participants who responded that they had ever heard a sound were instructed to answer the second question about the degree of tinnitus, the possible responses to which were: “No problem”, “I am annoyed and bothered”, and “I find it hard to sleep.” The participants were asked to choose only one of the responses. Based on the responses, we defined the following three groups: (1) “normal” for students without tinnitus, (2) “mild tinnitus” for students who had tinnitus, and chose “no problem” as the severity, and (3) “severe tinnitus” for students who were annoyed, bothered, or had sleep problems due to their tinnitus.

A part of the questionnaire inquired about the risk of LNE. The usage of personal listening devices, presence or absence of the experience of conflict with others due to the volume of a listening device, and the time and frequency of usage of leisure facilities (such as local area network (LAN) gaming centers, karaoke rooms, and concert auditoriums).

The participants also responded to four questions about auditory behavior. They were about their hearing in a noisy environment (“Have difficulty hearing or understanding in a noisy environment”), sound localization (“Have trouble finding the sound direction”), verbal working memory (“Have difficulty memorizing by listening to verbal orders”), and fatigue (“Easily feel tired”). The participants responded to the questions by assigning a score of 1 (worst) to 5 (best).

The subjects self-rated their academic performance to explore the association between educational attainment and tinnitus. The subjects responded to the following question: “Please rate your grades for the past year” using a five-point Likert scale (1, highest; 2, high; 3, middle; 4, low; and 5, lowest).

The subjects’ health status, medical history of themselves and their families, alcohol consumption, and smoking were also assessed. The questionnaire was based on Forms 1–2 and 1–3 of the Enforcement Rule of Health Screening at School, according to the School Health Act of South Korea. The health condition questionnaire inquired about general symptoms, respiratory system symptoms, circulatory system symptoms, digestive system symptoms, mental health, hematopoietic system symptoms, and about lifestyle factors such as diet, personal hygiene, exercise, safety, Internet use, home and school life, drug use, and sexuality; the possible responses were yes or no.

### Audiological evaluation

PTA was performed by audiometer (AD299b, Interacoustics, Assen, Denmark) in a sound-proof booth in a mobile vehicle. Four experienced audiologists conducted PTA testing at 0.5, 1, 2, 3, 4, 6, and 8 kHz. The hearing threshold was determined as the lowest sound level that was responded to correctly for 50% of stimuli. For frequencies with hearing impairment of  $\geq 25$  dB, the bone conduction threshold was evaluated to rule out the possibility of conductive hearing loss. High frequencies were defined as 3, 4, 6, and 8 kHz and speech frequencies were defined as 0.5, 1, and 2 kHz. Before the PTA, an otologic examination was performed to remove materials (such as cerumen and foreign bodies) that could affect hearing.

### Statistical analyses

We estimated the prevalence of tinnitus among Korean adolescents. The unweighted frequencies and weighted prevalences were used because of the multi-stage complex sampling design of the study. According to characteristics of participants, the prevalence of any tinnitus (mild or tinnitus) and severe tinnitus was calculated, and univariate logistic regression analyses were performed. We also estimated the arithmetic mean and standard error of the pure-tone threshold of each frequency, the pure-tone averages of speech and high frequencies, according to the severity of tinnitus. Differences among means were tested by analysis of variance. A multivariate logistic regression was performed to investigate the association of LNE with severe tinnitus, with adjustment variables for the following potential confounders: age, gender, household income, obesity, alcohol consumption, history of otitis, and history of sinusitis with reference to the results of our analyses and a previous report. [14] Finally, the mean values of HP (hearing in a noisy environment, sound localization, verbal working memory, and fatigue) were compared according to tinnitus severity. Multivariate linear regression analyses were performed to assess the differences in mean values by tinnitus severity with adjustment for potential confounders. Additionally, to investigate the associations between academic performance and hearing status, the mean subjective academic performance scores and 95% confidence intervals were calculated and subjected to multivariate linear regression analysis according to tinnitus status. Moreover, we investigated the prevalence of tinnitus according to the responses

to the physical health, mental health, and lifestyle items in the questionnaire by chi-squared test with Bonferroni correction for multiple comparisons (corrected significance level,  $P < 0.0009$ ). Statistical analyses were performed using the SAS SURVEYFREQ, SAS SURVEYLOGISTIC, SAS SURVEYREG, and SAS FREQ procedures (ver. 9.4; SAS Institute, Inc., Cary, NC), and statistical significance was defined as a two-sided  $P \leq 0.05$ .

## Results

Among the 248 schools, 109 (3,013 students) agreed to participate in the study. After excluding participants with incomplete answers ( $n = 860$ ) and missing PTA data ( $n = 358$ ), 1,795 participants were considered for inclusion. A further 202 subjects were excluded because of conductive hearing loss detected by PTA and/or abnormalities identified by otologic examination (e.g., perforation or retraction of tympanic membrane, middle ear effusion, or ear anomalies). Finally, 1,593 subjects were enrolled in the study. Additionally, analyses for the associations between questionnaires for health and lifestyle and tinnitus were performed after excluding missing variables for the questionnaires ( $n = 434$ ) (Fig 1).

Among the 1,593 students, 46.0% ( $n = 755$ ) responded that they had suffered tinnitus in the past year. The prevalence of severe tinnitus that induced some degree of discomfort was 9.1% ( $n = 154$ ). Severe tinnitus was more common in high school students (OR, 1.52; 95% CI, 1.03–2.23) and female students (OR, 2.47; 95% CI, 1.53–3.99) than in the others. Students who had consumed alcohol or smoked cigarettes had a higher prevalence of tinnitus. A history of sinusitis and of ear infection were also associated with tinnitus. Also, a history of ear infection was significantly associated with severe tinnitus causing discomfort. Among the risk factors, household income and BMI were not associated with the prevalence of tinnitus (Table 1). The hearing threshold of each frequency and the average thresholds of speech frequencies and high frequencies were not worse in the mild or severe tinnitus group than in the normal group (Table 2).

Among the LNE, usage of LAN gaming centers and usage of karaoke facilities were associated with severe tinnitus after adjusting for potential confounders (Table 3). Severe tinnitus was significantly associated with usage of LAN gaming centers (OR, 1.52; 95% CI, 1.02–2.24), and karaoke facilities (OR, 1.72; 95% CI, 1.01–2.94).

The severity of tinnitus was significantly associated with a decreased HP (Fig 2). Compared with normal students, those with severe tinnitus had significantly decreased scores for hearing in a noisy environment (3.7 vs. 3.1,  $P < 0.001$ ), sound localization (4.6 vs. 4.2,  $P < 0.001$ ), verbal working memory (4.4 vs. 4.1,  $P = 0.004$ ), and fatigue (3.9 vs. 2.9,  $P < 0.001$ ).

Severe tinnitus was associated with several physical and mental health factors: general condition, sore throat, gastrointestinal symptoms, depressive mood, hyperactivity, headache with throbbing pain, easy bruising, and menstrual pain (Table 4). Subjective academic performance was significantly associated with severe tinnitus only among high-school students (Fig 3).

## Discussion

This was the first official nationwide hearing survey of adolescents in South Korea. Previous studies used the data of the Korea National Health and Nutrition Examination Survey [15–18] or were questionnaire-based [8, 19]. The National Health and Nutrition Examination Surveys of Korea and the United States collect comprehensive health data. But this information is not intended for a review of hearing or tinnitus in adolescents. Therefore, most studies lacked detailed information on noise exposure history and risk factors for hearing or tinnitus; also, the PTA testing did not include 8 kHz, an important frequency for detecting noise-induced hearing loss and tinnitus. Our survey was prospectively designed to investigate the prevalence

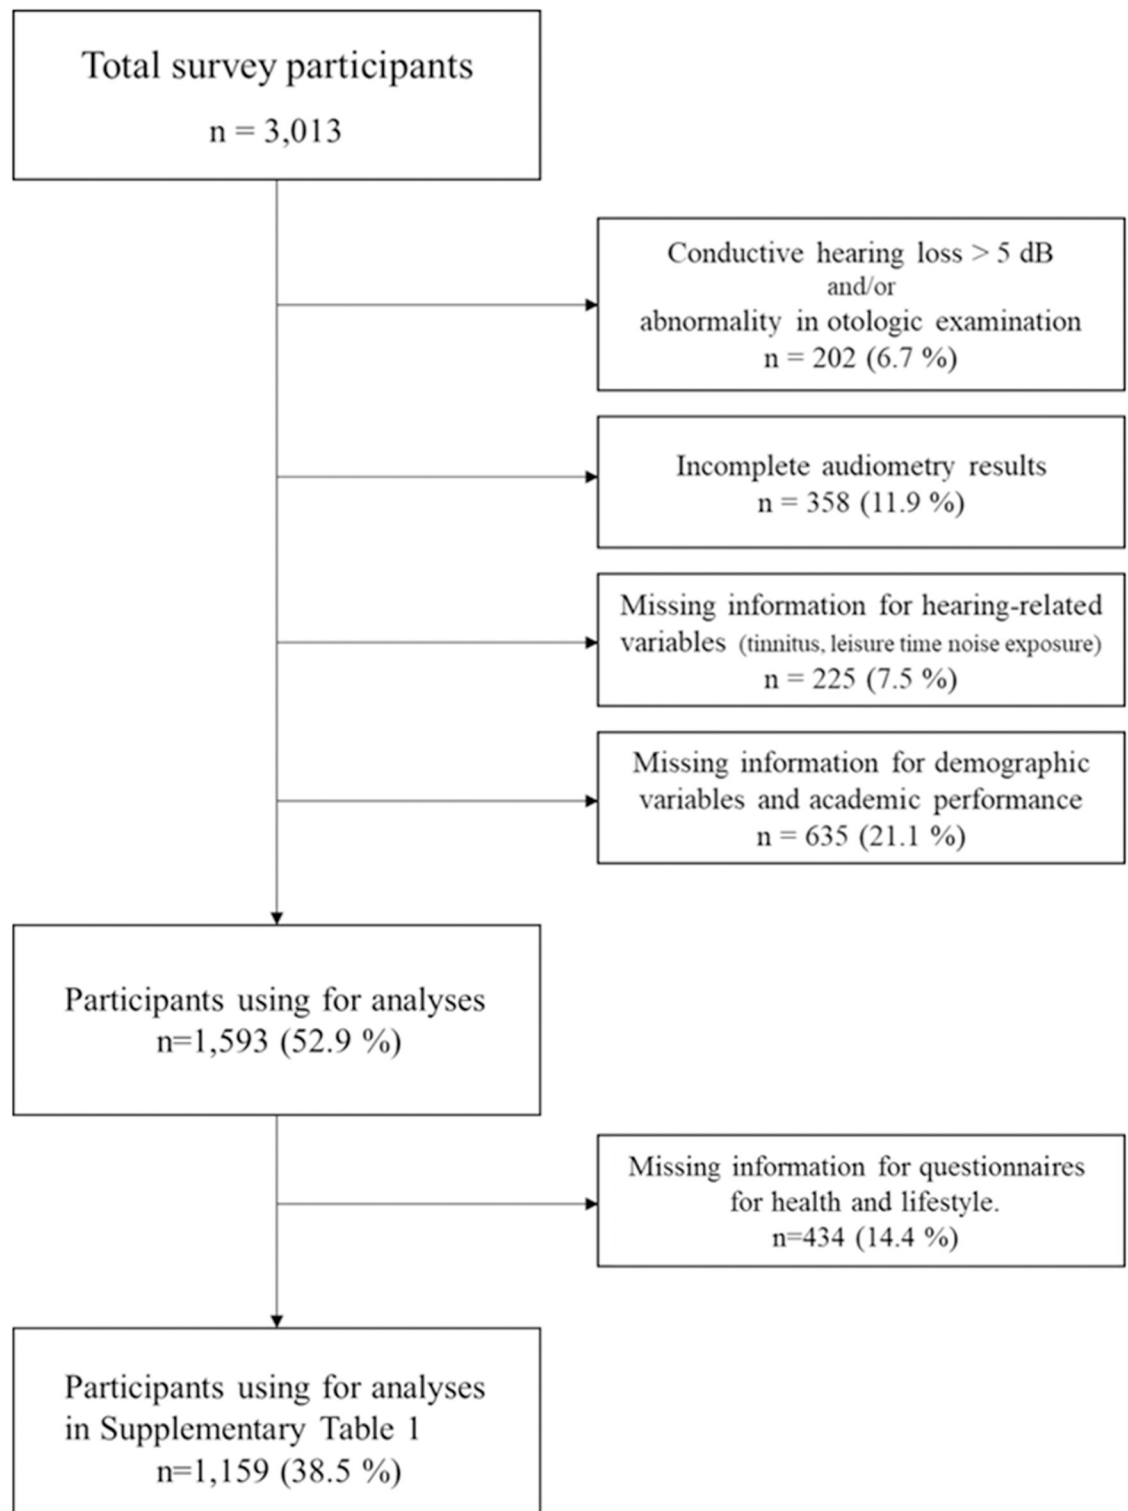

**Fig 1. Flow chart of selection of the subjects.**

<https://doi.org/10.1371/journal.pone.0236723.g001>

Table 1. Prevalence of tinnitus according to the participants' characteristics.

|                                         | Total              | Any tinnitus       |                    | Severe tinnitus |                    |
|-----------------------------------------|--------------------|--------------------|--------------------|-----------------|--------------------|
|                                         | n (%) <sup>a</sup> | n (%) <sup>b</sup> | OR (95% CI)        | n (%)           | OR (95% CI)        |
| <b>Total</b>                            | 1593 (100)         | 755 (46.0)         |                    | 154 (9.1)       |                    |
| <b>School Level</b>                     |                    |                    |                    |                 |                    |
| Middle school                           | 848 (51.1)         | 326 (37.2)         | 1 (Ref)            | 57 (7.5)        | 1 (Ref)            |
| High school                             | 745 (48.9)         | 429 (55.1)         | 2.07 (1.73–2.48)** | 97 (10.9)       | 1.52 (1.03–2.23)*  |
| <b>Gender</b>                           |                    |                    |                    |                 |                    |
| Male                                    | 804 (51.8)         | 315 (38.9)         | 1 (Ref)            | 57 (5.6)        | 1 (Ref)            |
| Female                                  | 789 (48.2)         | 440 (53.7)         | 1.82 (1.44–2.31)** | 97 (12.9)       | 2.47 (1.53–3.99)** |
| <b>Household income per month, US\$</b> |                    |                    |                    |                 |                    |
| < 2,000                                 | 259 (13.5)         | 124 (52.1)         | 1 (Ref)            | 25 (11.6)       | 1 (Ref)            |
| 2,000–3,000                             | 310 (19.0)         | 148 (46.4)         | 0.80 (0.58–1.09)   | 32 (9.7)        | 0.83 (0.48–1.41)   |
| 3,000–4,000                             | 402 (25.2)         | 191 (44.6)         | 0.74 (0.52–1.06)   | 35 (9.1)        | 0.76 (0.39–1.49)   |
| > 4,000                                 | 622 (42.3)         | 292 (44.7)         | 0.74 (0.55–1.02)   | 62 (8.1)        | 0.68 (0.40–1.16)   |
| <b>BMI, kg/m<sup>2</sup></b>            |                    |                    |                    |                 |                    |
| < 25                                    | 1349 (84.5)        | 633 (45.7)         | 1 (Ref)            | 131 (9.5)       | 1 (Ref)            |
| ≥ 25                                    | 244 (15.5)         | 122 (47.9)         | 1.09 (0.81–1.48)   | 23 (6.9)        | 0.71 (0.49–1.01)   |
| <b>Smoking status</b>                   |                    |                    |                    |                 |                    |
| Never                                   | 1453 (90.7)        | 684 (45.0)         | 1 (Ref)            | 134 (8.5)       | 1 (Ref)            |
| Ever                                    | 140 (9.3)          | 71 (55.7)          | 1.53 (1.11–2.12)*  | 20 (15.0)       | 1.89 (0.88–4.03)   |
| <b>Alcohol consumption</b>              |                    |                    |                    |                 |                    |
| Never                                   | 1282 (81.4)        | 568 (43.4)         | 1 (Ref)            | 113 (8.7)       | 1 (Ref)            |
| Ever                                    | 311 (18.6)         | 187 (57.6)         | 1.77 (1.30–2.42)** | 41 (11.0)       | 1.30 (0.83–2.04)   |
| <b>History of sinusitis</b>             |                    |                    |                    |                 |                    |
| No                                      | 1438 (89.7)        | 673 (45.1)         | 1 (Ref)            | 131 (8.8)       | 1 (Ref)            |
| Yes                                     | 155 (10.3)         | 82 (53.7)          | 1.41 (1.13–1.76)*  | 23 (12.3)       | 1.46 (0.96–2.20)   |
| <b>History of ear infection</b>         |                    |                    |                    |                 |                    |
| No                                      | 1435 (90.4)        | 662 (44.5)         | 1 (Ref)            | 128 (8.0)       | 1 (Ref)            |
| Yes                                     | 158 (9.6)          | 93 (60.0)          | 1.87 (1.32–2.66)** | 26 (19.8)       | 2.84 (1.46–5.53)*  |

<sup>a</sup> Unweighted frequencies and weighted percentages

<sup>b</sup> Unweighted frequencies and weighted row percentages.

\*  $P < 0.05$

\*\*  $P < 0.001$

OR, odds ratio; CI, confidence interval; BMI, body mass index; Ref, reference

<https://doi.org/10.1371/journal.pone.0236723.t001>

and risk factors of hearing and tinnitus in adolescents. We carefully selected a questionnaire regarding hearing and tinnitus and enrolled subjects in a systematically randomized manner according to region and type of school. All PTA tests were performed at the same facility by a qualified audiologist after an otologic examination by ear-nose-throat physicians. So, our results are representative of tinnitus among South Korean adolescents.

### Prevalence of tinnitus among adolescents

The prevalence of tinnitus among South Korean adolescents is 45.6% and that of severe tinnitus is 9.1%. It is more common in older adolescents and girls. The prevalence of tinnitus among adolescents differs according to the definition, study population, and method of evaluation. [3] The prevalence of tinnitus among adolescents has been reported to be 6.5% [20] to 43.9% [11]. The prevalence of severe tinnitus ranges from 0.6% [15] to 15.72% [16]. The

Table 2. Results of pure-tone audiometry according to tinnitus symptom.

|           |                     | Right (mean ± SE) |                         |                           |                | Left (mean ± SE) |                         |                           |                |
|-----------|---------------------|-------------------|-------------------------|---------------------------|----------------|------------------|-------------------------|---------------------------|----------------|
|           |                     | Normal (n = 838)  | Mild tinnitus (n = 601) | Severe tinnitus (n = 154) | P <sup>a</sup> | Normal (n = 838) | Mild tinnitus (n = 601) | Severe tinnitus (n = 154) | P <sup>a</sup> |
| Average   | Speech <sup>b</sup> | 8.7 ± 0.2         | 8.8 ± 0.2               | 8.6 ± 0.4                 | 0.707          | 7.4 ± 0.2        | 7.6 ± 0.2               | 7.3 ± 0.6                 | 0.459          |
|           | High <sup>c</sup>   | 4.8 ± 0.1         | 4.9 ± 0.1               | 4.5 ± 0.3                 | 0.232          | 4.3 ± 0.1        | 4.5 ± 0.1               | 4.2 ± 0.4                 | 0.371          |
| Frequency | 0.5 kHz             | 10.9 ± 0.4        | 10.3 ± 0.3              | 10.8 ± 0.5                | 0.177          | 9.9 ± 0.3        | 10.2 ± 0.4              | 10.5 ± 0.6                | 0.437          |
|           | 1 kHz               | 8.0 ± 0.2         | 8.4 ± 0.3               | 7.8 ± 0.4                 | 0.263          | 6.4 ± 0.2        | 6.5 ± 0.3               | 6.0 ± 0.6                 | 0.478          |
|           | 2 kHz               | 7.2 ± 0.2         | 7.8 ± 0.2               | 7.1 ± 0.5                 | <b>0.041</b>   | 5.9 ± 0.2        | 6.2 ± 0.2               | 5.5 ± 0.6                 | 0.169          |
|           | 3 kHz               | 6.8 ± 0.2         | 6.8 ± 0.2               | 6.4 ± 0.5                 | 0.642          | 5.8 ± 0.2        | 6.4 ± 0.2               | 5.9 ± 0.4                 | 0.164          |
|           | 4 kHz               | 7.9 ± 0.3         | 7.9 ± 0.3               | 6.8 ± 0.5                 | 0.118          | 6.7 ± 0.2        | 6.7 ± 0.3               | 6.4 ± 0.9                 | 0.828          |
|           | 6 kHz               | 2.1 ± 0.1         | 2.1 ± 0.1               | 2.2 ± 0.2                 | 0.586          | 2.1 ± 0.1        | 2.2 ± 0.1               | 2.0 ± 0.2                 | 0.439          |
|           | 8 kHz               | 2.6 ± 0.1         | 2.6 ± 0.1               | 2.4 ± 0.2                 | 0.571          | 2.6 ± 0.1        | 2.7 ± 0.1               | 2.5 ± 0.2                 | 0.687          |

<sup>a</sup> Analysis of variance was performed because of the complex structure of the survey.

<sup>b</sup> Pure tone averages of 0.5, 1, and 2 kHz

<sup>c</sup> Pure tone averages of 3, 4, 6, and 8 kHz

<https://doi.org/10.1371/journal.pone.0236723.t002>

prevalence of transient tinnitus is 39.7% [21] to 73.5% [22]. Prior studies applied different definitions of tinnitus severity, e.g., bothersome, uncomfortable, worried or concerned, and some used a yes or no response. [23, 24] Here, we used three tinnitus severity categories: no, any,

Table 3. Multivariate logistic regression of the association between leisure-time noise exposure and tinnitus.

|                                                    | Total<br>n (%) <sup>b</sup> | Severe tinnitus<br>n (%) <sup>c</sup> | Unadjusted model<br>OR (95% CI) | Adjusted model <sup>a</sup><br>OR (95% CI) |
|----------------------------------------------------|-----------------------------|---------------------------------------|---------------------------------|--------------------------------------------|
| <b>Personal listening device use</b>               |                             |                                       |                                 |                                            |
| No                                                 | 148 (10.1)                  | 12 (6.7)                              | 1 (Ref)                         | 1 (Ref)                                    |
| Yes                                                | 1428 (89.9)                 | 142 (9.5)                             | 1.51 (0.86–2.66)                | 1.23 (0.68–2.21)                           |
| <b>Request to turn down the volume</b>             |                             |                                       |                                 |                                            |
| Not applicable                                     | 148 (10.1)                  | 12 (6.7)                              | 1 (Ref)                         | 1 (Ref)                                    |
| Never experienced                                  | 237 (13.8)                  | 33 (11.3)                             | 0.69 (0.38–1.22)                | 0.83 (0.46–1.51)                           |
| Ever experienced                                   | 1191 (76.2)                 | 109 (9.2)                             | 1.26 (0.71–2.23)                | 1.14 (0.67–1.95)                           |
| <b>Usage of LAN gaming center in the past year</b> |                             |                                       |                                 |                                            |
| No                                                 | 638 (40.1)                  | 53 (8.7)                              | 1 (Ref)                         | 1 (Ref)                                    |
| Yes                                                | 938 (59.9)                  | 101 (9.5)                             | 1.11 (0.74–1.65)                | <b>1.52 (1.02–2.24)*</b>                   |
| <b>Usage of karaoke in the past year</b>           |                             |                                       |                                 |                                            |
| No                                                 | 386 (23.4)                  | 24 (4.9)                              | 1 (Ref)                         | 1 (Ref)                                    |
| Yes                                                | 1190 (76.6)                 | 130 (10.5)                            | <b>2.33 (1.29–4.21)*</b>        | <b>1.72 (1.01–2.94)*</b>                   |
| <b>Attendance at a concert in the past year</b>    |                             |                                       |                                 |                                            |
| No                                                 | 1372 (88.3)                 | 133 (9.2)                             | 1 (Ref)                         | 1 (Ref)                                    |
| Yes                                                | 204 (11.7)                  | 21 (9.3)                              | 1.02 (0.61–1.71)                | 0.74 (0.42–1.29)                           |
| <b>Attendance at a dance club in the past year</b> |                             |                                       |                                 |                                            |
| No                                                 | 1572 (99.6)                 | 154 (9.2)                             | 1 (Ref)                         | 1 (Ref)                                    |
| Yes                                                | 4 (0.4)                     | 0 (0)                                 | -                               | -                                          |

<sup>a</sup> Adjusted for age, gender, household income, obesity, smoking, alcohol consumption, history of otitis, and history of sinusitis

<sup>b</sup> Unweighted frequencies and weighted percentages

<sup>c</sup> Unweighted frequencies and weighted row percentages of severe tinnitus

\* P < 0.05

OR, odds ratio; CI, confidence interval

<https://doi.org/10.1371/journal.pone.0236723.t003>

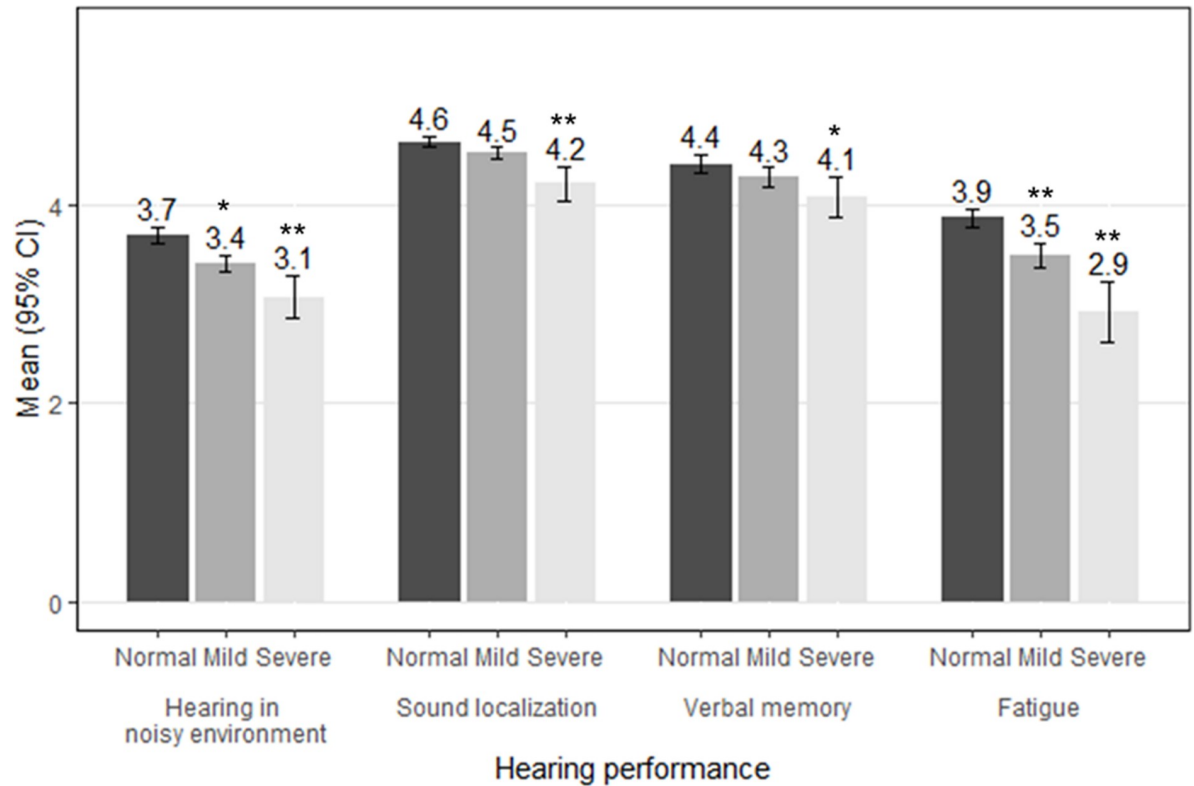

**Fig 2. Logistic regression of the association between hearing performance and tinnitus severity.**

<https://doi.org/10.1371/journal.pone.0236723.g002>

and severe. Severe tinnitus was defined as that which disturbs sleep, a definition that is simple and reliable. [16] Use of the tinnitus handicap inventory or VAS for tinnitus may have yielded more comprehensive data on tinnitus severity. [25]

The prevalence of tinnitus increases with age. [5, 15, 26] However among adolescents, those in their mid-teens have the highest incidence of tinnitus. [23] In this study, older adolescents had a higher prevalence of tinnitus, possibly due to the higher level of stress in high school; however, our use of only two age groups prevents the drawing of any firm conclusions. Among the high school, but not the middle school, students, tinnitus was correlated with academic attainment. The prevalence of tinnitus was higher in females than males, as reported previously. [3, 18, 27] This may be due to the greater tendency of girls to describe symptoms [28] and their more frequent generation of spontaneous otoacoustic emissions [29]. A history of ear infection is reportedly a risk factor for tinnitus and an association between tinnitus and a low household income has been described; [18] our findings were in agreement with these reports and we found that the same factors were associated with hearing loss. [11]

### Factors associated with tinnitus among adolescents

Tinnitus is associated with LNE at karaoke facilities and LAN gaming centers, as well as with a poor HP, but not with hearing loss. Hearing loss is often associated with tinnitus, [6] but not in adolescents. [4, 18] Our data also showed no relationship between tinnitus and hearing loss up to 8 kHz. Noise exposure is a risk factor for tinnitus, but does not induce hearing loss. [18, 22, 27] We found that tinnitus was associated with usage of LAN gaming centers and karaoke facilities, which are noisy leisure activities that many Korean adolescents enjoy. [11] Williams *et al.* also reported that experience of tinnitus is not associated with hearing loss as detected by



**Table 4. Prevalence of tinnitus according to physical health, mental health, and lifestyle factors.** (the Enforcement Rule of Health Screening at School, according to the School Health Act of South Korea).

|                    |                                                                                                   | No                 |                       | Yes               |                       | P <sup>a</sup>     |
|--------------------|---------------------------------------------------------------------------------------------------|--------------------|-----------------------|-------------------|-----------------------|--------------------|
|                    |                                                                                                   | n (%)              | Severe Tinnitus n (%) | n (%)             | Severe Tinnitus n (%) |                    |
| Condition          | <b>Catch a cold easily</b>                                                                        | <b>864 (74.6)</b>  | <b>69 (8.0)</b>       | <b>295 (25.5)</b> | <b>48 (16.3)</b>      | <b>&lt; 0.0001</b> |
|                    | <b>I lack strength and I get tired easily</b>                                                     | <b>807 (69.6)</b>  | <b>57 (7.1)</b>       | <b>352 (30.4)</b> | <b>60 (17.1)</b>      | <b>&lt; 0.0001</b> |
|                    | I think I am not healthy                                                                          | 1010 (87.1)        | 91 (9.0)              | 149 (12.9)        | 26 (17.5)             | 0.0014             |
| Respiratory System | My Nose and eyes are itchy, I sneeze, and sometimes I have a runny nose.                          | 808 (69.7)         | 71 (8.8)              | 351 (30.3)        | 46 (13.1)             | 0.0249             |
|                    | I experience shortness of breath and I hear whistles from my chest.                               | 1094 (94.4)        | 105 (9.6)             | 65 (5.6)          | 12 (18.5)             | 0.0212             |
|                    | I have yellow sputum when I cough.                                                                | 994 (85.8)         | 91 (9.2)              | 165 (14.2)        | 26 (15.8)             | 0.0091             |
|                    | I usually have trouble breathing through my nose because my nose is blocked.                      | 904 (78.0)         | 81 (9.0)              | 255 (22)          | 36 (14.1)             | 0.0158             |
|                    | I am told that I often snore badly.                                                               | 1087 (93.8)        | 106 (9.8)             | 72 (6.2)          | 11 (15.3)             | 0.1317             |
|                    | <b>I often have fever and a sore throat.</b>                                                      | <b>1063 (91.7)</b> | <b>91 (8.6)</b>       | <b>96 (8.3)</b>   | <b>26 (27.1)</b>      | <b>&lt; 0.0001</b> |
|                    | There is a lump in my neck.                                                                       | 1118 (96.5)        | 108 (9.7)             | 41 (3.5)          | 9 (22.0)              | 0.0103             |
| Circulatory System | I get out of breath, even after a little exercise, compared with others.                          | 970 (83.7)         | 88 (9.1)              | 189 (16.3)        | 29 (15.3)             | 0.0088             |
|                    | My complexion is bad and my heart pounds even when I am at rest                                   | 1139 (98.3)        | 115 (10.1)            | 20 (1.7)          | 2 (10.0)              | 0.9887             |
| Digestive          | <b>I have a burning feeling or pain in my stomach</b>                                             | <b>862 (74.4)</b>  | <b>55 (6.4)</b>       | <b>297 (25.6)</b> | <b>62 (20.9)</b>      | <b>&lt; 0.0001</b> |
|                    | <b>I feel stuffy or full.</b>                                                                     | <b>891 (76.9)</b>  | <b>60 (6.7)</b>       | <b>268 (23.1)</b> | <b>57 (21.3)</b>      | <b>&lt; 0.0001</b> |
|                    | <b>My lower belly is painful, or I often have diarrhea.</b>                                       | <b>946 (81.6)</b>  | <b>77 (8.1)</b>       | <b>213 (18.4)</b> | <b>40 (18.8)</b>      | <b>&lt; 0.0001</b> |
|                    | <b>My stomach feels tight or bloated.</b>                                                         | <b>985 (85.0)</b>  | <b>77 (7.8)</b>       | <b>174 (15)</b>   | <b>40 (23.0)</b>      | <b>&lt; 0.0001</b> |
| Mental Health      | <b>I feel hopeless because I am sad or depressed.</b>                                             | <b>1022 (88.2)</b> | <b>90 (8.8)</b>       | <b>137 (11.8)</b> | <b>27 (19.7)</b>      | <b>&lt; 0.0001</b> |
|                    | <b>I often do not want to go to school.</b>                                                       | <b>951 (82.1)</b>  | <b>80 (8.4)</b>       | <b>208 (18)</b>   | <b>37 (17.8)</b>      | <b>&lt; 0.0001</b> |
|                    | I have seriously considered suicide or attempted suicide.                                         | 1132 (97.7)        | 112 (9.9)             | 27 (2.3)          | 5 (18.5)              | 0.1415             |
|                    | I often feel nervous as if I am going crazy.                                                      | 1111 (95.9)        | 110 (9.9)             | 48 (4.1)          | 7 (14.6)              | 0.2918             |
|                    | <b>I am not calm. I am too active, which can interfere with the activities of other children.</b> | <b>1075 (92.8)</b> | <b>98 (9.1)</b>       | <b>84 (7.3)</b>   | <b>19 (22.6)</b>      | <b>&lt; 0.0001</b> |
| Blood              | I often have nosebleeds and the bleeding does not stop quickly if I am injured.                   | 1097 (94.7)        | 106 (9.7)             | 62 (5.4)          | 11 (17.7)             | 0.0399             |
|                    | <b>I get bruised easily.</b>                                                                      | <b>998 (86.1)</b>  | <b>84 (8.4)</b>       | <b>161 (13.9)</b> | <b>33 (20.5)</b>      | <b>&lt; 0.0001</b> |

(Continued)

Table 4. (Continued)

|                    |                                                                                                         | No                 |                       | Yes               |                       | P <sup>a</sup>     |
|--------------------|---------------------------------------------------------------------------------------------------------|--------------------|-----------------------|-------------------|-----------------------|--------------------|
|                    |                                                                                                         | n (%)              | Severe Tinnitus n (%) | n (%)             | Severe Tinnitus n (%) |                    |
| Other Symptoms     | <b>My headache or migraine is severe.</b>                                                               | <b>1006 (86.8)</b> | <b>79 (7.9)</b>       | <b>153 (13.2)</b> | <b>38 (24.8)</b>      | <b>&lt; 0.0001</b> |
|                    | My ears are sore, or I have an ear discharge.                                                           | 1129 (97.4)        | 109 (9.7)             | 30 (2.6)          | 8 (26.7)              | 0.0023             |
|                    | My jaw joints are sore, or I cannot open my mouth well.                                                 | 1109 (95.7)        | 109 (9.8)             | 50 (4.3)          | 8 (16)                | 0.1565             |
|                    | <b>I have a throbbing pain in my neck/waist/knee etc.</b>                                               | <b>968 (83.5)</b>  | <b>77 (8.0)</b>       | <b>191 (16.5)</b> | <b>40 (20.9)</b>      | <b>&lt; 0.0001</b> |
|                    | <b>(For girls) My menstrual cramps are severe.</b>                                                      | <b>473 (79.4)</b>  | <b>43 (9.1)</b>       | <b>123 (20.6)</b> | <b>28 (22.8)</b>      | <b>&lt; 0.0001</b> |
| Diet               | I eat breakfast regularly.                                                                              | 382 (33)           | 43 (11.3)             | 777 (67)          | 74 (9.5)              | 0.3573             |
|                    | I drink milk or dairy products every day.                                                               | 465 (40.1)         | 55 (11.8)             | 694 (59.9)        | 62 (8.9)              | 0.1089             |
|                    | I eat vegetables and fruit every day.                                                                   | 315 (27.2)         | 37 (11.8)             | 844 (72.8)        | 80 (9.5)              | 0.2543             |
|                    | I rarely eat sweet or salty food.                                                                       | 894 (77.1)         | 93 (10.4)             | 265 (22.9)        | 24 (9.1)              | 0.5229             |
|                    | I consume soft drinks, hamburgers, pizza, or snacks almost every day.                                   | 942 (81.3)         | 86 (9.1)              | 217 (18.7)        | 31 (14.3)             | 0.0230             |
|                    | I skip meals or take drugs to lose weight.                                                              | 1108 (95.6)        | 109 (9.8)             | 51 (4.4)          | 8 (15.7)              | 0.1752             |
| Personal Hygiene   | I wash my hands with soap before eating or after going out.                                             | 346 (29.9)         | 40 (11.6)             | 813 (70.2)        | 77 (9.5)              | 0.2799             |
|                    | I brush my teeth more than twice a day.                                                                 | 80 (6.9)           | 5 (6.3)               | 1079 (93.1)       | 112 (10.4)            | 0.2368             |
| Exercise           | I exercise intensely at least three times a week.                                                       | 650 (56.1)         | 75 (11.5)             | 509 (43.9)        | 42 (8.3)              | 0.0653             |
|                    | I allocate study and exercise time well. I feel refreshed after sleeping.                               | 677 (58.4)         | 83 (12.3)             | 482 (41.6)        | 34 (7.1)              | 0.0037             |
| Safety             | I wear a seat belt when I ride in a car.                                                                | 404 (34.9)         | 38 (9.4)              | 755 (65.1)        | 79 (10.5)             | 0.5690             |
|                    | I wear a helmet or protective gear when I use inline skates, roller blades, skateboards, bicycles, etc. | 812 (70.1)         | 86 (10.6)             | 347 (29.9)        | 31 (8.9)              | 0.3910             |
| Internet           | I used the internet or play games more than 2 hours a day.                                              | 715 (61.7)         | 70 (9.8)              | 444 (38.3)        | 47 (10.6)             | 0.6621             |
|                    | I often watch pornography or chat on adult sites.                                                       | 1124 (97)          | 111 (9.9)             | 35 (3)            | 6 (17.1)              | 0.1599             |
| Home & School Life | I have been bullied or isolated by my friends over the past year.                                       | 1134 (97.8)        | 111 (9.8)             | 25 (2.2)          | 6 (24)                | 0.0196             |
|                    | I have a person to talk to when I have worries or problems.                                             | 209 (18)           | 23 (11)               | 950 (82)          | 94 (9.9)              | 0.6296             |
|                    | I am worried about problems in my family.                                                               | 1030 (88.9)        | 99 (9.6)              | 129 (11.1)        | 18 (14)               | 0.1228             |
|                    | I have seriously considered running away from home during the past year.                                | 1105 (95.3)        | 105 (9.5)             | 54 (4.7)          | 12 (22.2)             | 0.0024             |
|                    | My safety is threatened by violence at home or school.                                                  | 1153 (99.5)        | 116 (10.1)            | 6 (0.5)           | 1 (16.7)              | 0.5921             |
|                    | I have carried a knife/club/nunchaku as a weapon.                                                       | 1151 (99.3)        | 114 (9.9)             | 8 (0.7)           | 3 (37.5)              | 0.0098             |
|                    | I have used marijuana or psychotropic drugs to hallucinate.                                             | 1157 (99.8)        | 117 (10.1)            | 2 (0.2)           | 0 (0)                 | 0.6353             |

(Continued)

Table 4. (Continued)

|           |                                                           | No          |                       | Yes      |                       | P <sup>a</sup> |
|-----------|-----------------------------------------------------------|-------------|-----------------------|----------|-----------------------|----------------|
|           |                                                           | n (%)       | Severe Tinnitus n (%) | n (%)    | Severe Tinnitus n (%) |                |
| Sexuality | I worry about gender issues.                              | 1142 (98.5) | 114 (10)              | 17 (1.5) | 3 (17.7)              | 0.2978         |
|           | I have been abused physically, mentally, and/or sexually. | 1155 (99.7) | 116 (10)              | 4 (0.4)  | 1 (25)                | 0.3216         |

<sup>a</sup> Chi-squared tests were performed, and p-values in bold indicate significance after Bonferroni correction for multiple comparisons ( $P < 0.0009$ ).

<https://doi.org/10.1371/journal.pone.0236723.t004>

PTA or otoacoustic emissions (OAEs) in young Australians. [30] However, there was correlation between the experience of tinnitus and the frequency of experience of tinnitus with cumulative life-time noise exposure. [30] An elevated noise level can damage the synapse of the auditory nerve without damaging the outer hair cells. [31] Such damage or hearing loss could induce neuroplasticity in the auditory system and lead to the development of tinnitus. [32] Some patients have a normal hearing threshold by conventional PTA but decreased HP in noisy situations, temporal resolution, and wave I potential in the auditory brain stem response. [9, 32] This is known as hidden hearing loss or cochlear synatopathy. [31, 33] In this study, adolescent patients with tinnitus showed poor HP (poor localization, hearing difficulty in noisy situations, decreased memory for verbal orders, and susceptibility to fatigue). These

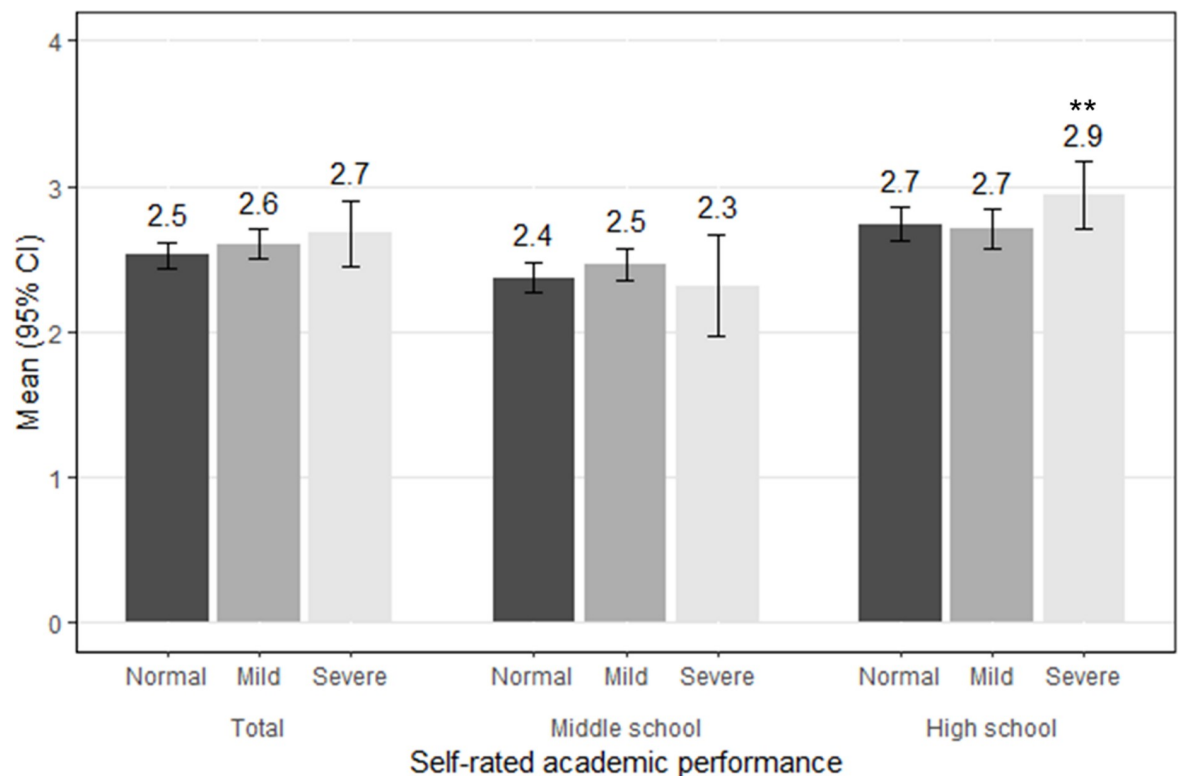

**Fig 3. Subjective academic performance according to the severity of tinnitus.** Subjective academic performance for the past year was assessed using the following question: “Please rate your grades for the past year (1, highest; 2, high; 3, middle; 4, low; and 5, lowest).” Multivariate linear regression analysis was performed to examine differences in subjective academic performance according to tinnitus status (mild and severe group) in comparison to the healthy control group. \*\*  $P < 0.001$ .

<https://doi.org/10.1371/journal.pone.0236723.g003>

findings suggest the existence of hidden hearing loss among adolescents. Ultra-high-frequency PTA or other hidden hearing loss tests (*e.g.*, hearing-in-noise test and auditory brain stem response) may enable detection of hearing deterioration in adolescents. [34] Childhood tinnitus patients are more likely report to deterioration in their hearing ability over time. [4] Patients with tinnitus with normal hearing should wear appropriate ear protection in noisy situations. [27, 30]

### Comorbid conditions of tinnitus among adolescents

Adolescents with tinnitus have a variety of somatization symptoms and frequently smoke cigarettes and consume alcohol. Adolescent patients with tinnitus more often complain about physical health issues, *e.g.*, severe headache, severe menstrual cramping, throbbing pain in the body, sore throat, digestive problems, and bruising. Attentional mechanism in tinnitus could make this difference. [35] Tinnitus may be associated with somatization and somatoform disorder. [36, 37] Because some conditions, *e.g.*, pain and headache, have similar pathophysiologic mechanisms they could be symptoms of the same disease. [38, 39]

Adolescents are vulnerable to psycho-emotional factors, which can have detrimental effects on emotional development. [40] Adolescent patients with tinnitus often have mental health problems, such as depression, anxiety, suicidal thoughts, and sleep disturbance. [8, 41, 42] The severity of tinnitus is correlated with psychiatric disorders and the severity of depression and anxiety. [8, 43] Tinnitus can induce psychological symptoms [36], but the causality of the relationship has not been established. In this study, a large proportion of the adolescent patients with tinnitus had a history of bullying or isolation and of carrying a weapon (*e.g.*, knife or club). In addition, the adolescent patients with tinnitus have a high prevalence of smoking, alcohol drinking, and substance abuse; [5, 18, 19, 44] this is in agreement with our findings. Adolescent are vulnerable to substance abuse, which is common in those with psychiatric comorbidities. [45] Therefore, adolescents with tinnitus should receive appropriate counseling to improve their mental health and prevent substance abuse.

### Limitations

The cross-sectional design of this study prevented assessment of the causality of the associations identified. Smoking and alcohol consumption are reportedly causes of tinnitus. [5, 19, 44] A longitudinal follow up study is needed to assess the causality of the associations and the long-term effect of tinnitus and hearing change in adolescents. This study enrolled students attending middle or high schools. In South Korea, attending middle school is mandated by law and the rate of enrollment in high school was about 93% in 2016. [46] We did not investigate the laterality of tinnitus and objective tinnitus. In addition, testing of tinnitus loudness and pitch matching would have provided further information on tinnitus in adolescents.

### Conclusions

Tinnitus is common among adolescents, particularly females and high-school students. Tinnitus is associated with LNE and educational attainment. Adolescents with tinnitus tend to smoke cigarettes and consume alcohol. Appropriate counseling is needed to alleviate tinnitus and prevent substance abuse. Patients with tinnitus but not hearing loss should wear ear protection in noisy situations to prevent the development of noise-induced hearing loss.

### Supporting information

**S1 File. Dataset.**  
(XLSX)

**S1 Questionnaire. Questionnaire for students.**  
(PDF)

**S2 Questionnaire. Questionnaire for parents.**  
(PDF)

**S1 Text.**  
(DOCX)

## Author Contributions

**Conceptualization:** Yun-Chul Hong, Seung Ha Oh, Moo Kyun Park.

**Formal analysis:** Jihye Rhee, Dongwook Lee.

**Funding acquisition:** Seung Ha Oh.

**Investigation:** Dongwook Lee, Myung Whan Suh, Jun Ho Lee, Moo Kyun Park.

**Methodology:** Myung Whan Suh, Jun Ho Lee, Moo Kyun Park.

**Supervision:** Myung Whan Suh, Jun Ho Lee, Yun-Chul Hong, Seung Ha Oh, Moo Kyun Park.

**Validation:** Yun-Chul Hong, Moo Kyun Park.

**Writing – original draft:** Jihye Rhee, Dongwook Lee.

**Writing – review & editing:** Jihye Rhee, Dongwook Lee, Jun Ho Lee, Moo Kyun Park.

## References

1. Baguley D, McFerran D, Hall D. Tinnitus. *Lancet*. 2013; 382(9904):1600–7. [https://doi.org/10.1016/S0140-6736\(13\)60142-7](https://doi.org/10.1016/S0140-6736(13)60142-7) Epub 2013 Jul 2. PMID: 23827090
2. Heller AJ. Classification and epidemiology of tinnitus. *Otolaryngol Clin North Am*. 2003; 36(2):239–48. [https://doi.org/10.1016/s0030-6665\(02\)00160-3](https://doi.org/10.1016/s0030-6665(02)00160-3) PMID: 12856294
3. Rosing SN, Schmidt JH, Wedderkopp N, Baguley DM. Prevalence of tinnitus and hyperacusis in children and adolescents: a systematic review. *BMJ Open*. 2016; 6(6):e010596. <https://doi.org/10.1136/bmjopen-2015-010596> PMID: 27259524
4. Aarhus L, Engdahl B, Tambs K, Kvestad E, Hoffman HJ. Association Between Childhood Hearing Disorders and Tinnitus in Adulthood. *JAMA Otolaryngol Head Neck Surg*. 2015; 141(11):983–9. <https://doi.org/10.1001/jamaoto.2015.2378> PMID: 26540147
5. Lee DY, Kim YH. Risk factors of pediatric tinnitus: Systematic review and meta-analysis. *Laryngoscope*. 2018; 128(6):1462–8. <https://doi.org/10.1002/lary.26924> Epub 2017 Nov 2. PMID: 29094364
6. Axelsson A, Ringdahl A. Tinnitus—a study of its prevalence and characteristics. *Br J Audiol*. 1989; 23(1):53–62. <https://doi.org/10.3109/03005368909077819> PMID: 2784987
7. Bhatt JM, Bhattacharyya N, Lin HW. Relationships between tinnitus and the prevalence of anxiety and depression. *Laryngoscope*. 2017; 127(2):466–9. <https://doi.org/10.1002/lary.26107> Epub 2016 Jun 15. PMID: 27301552
8. Kim SY, Jeon YJ, Lee JY, Kim YH. Characteristics of tinnitus in adolescents and association with psychoemotional factors. *Laryngoscope*. 2017; 127(9):2113–9. <https://doi.org/10.1002/lary.26334> Epub 2016 Oct 24. PMID: 27774600
9. Gilles A, Schlee W, Rabau S, Wouters K, Franssen E, Van de Heyning P. Decreased Speech-In-Noise Understanding in Young Adults with Tinnitus. *Front Neurosci*. 2016; 10:288. <https://doi.org/10.3389/fnins.2016.00288> eCollection 2016. PMID: 27445661
10. An YH, Lee LH, Yoon SW, Jin SY, Shim HJ. Does tinnitus affect the sound localization ability? *Otol Neurotol*. 2012; 33(5):692–8. <https://doi.org/10.1097/MAO.0b013e31825952e9> PMID: 22699979
11. Rhee J, Lee D, Lim HJ, Park MK, Suh MW, Lee JH, et al. Hearing loss in Korean adolescents: The prevalence thereof and its association with leisure noise exposure. *PLoS One*. 2019; 14(1):e0209254. <https://doi.org/10.1371/journal.pone.0209254> eCollection 2019. PMID: 30608926

12. Park KH, Lee SH, Koo J-W, Park HY, Lee KY, Choi YS, et al. Prevalence and associated factors of tinnitus: data from the Korean National Health and Nutrition Examination Survey 2009–2011. *J Epidemiol.* 2014;JE20140024.
13. Shargorodsky J, Curhan GC, Farwell WR. Prevalence and characteristics of tinnitus among US adults. *The American journal of medicine.* 2010; 123(8):711–8. <https://doi.org/10.1016/j.amjmed.2010.02.015> PMID: 20670725
14. Nondahl DM, Cruickshanks KJ, Huang G-H, Klein BE, Klein R, Javier Nieto F, et al. Tinnitus and its risk factors in the Beaver Dam offspring study. *International journal of audiology.* 2011; 50(5):313–20. <https://doi.org/10.3109/14992027.2010.551220> PMID: 21309642
15. Park B, Choi HG, Lee HJ, An SY, Kim SW, Lee JS, et al. Analysis of the prevalence of and risk factors for tinnitus in a young population. *Otol Neurotol.* 2014; 35(7):1218–22. <https://doi.org/10.1097/MAO.0000000000000472> PMID: 24914798
16. Park KH, Lee SH, Koo JW, Park HY, Lee KY, Choi YS, et al. Prevalence and associated factors of tinnitus: data from the Korean National Health and Nutrition Examination Survey 2009–2011. *J Epidemiol.* 2014; 24(5):417–26. Epub 2014 Jun 21. <https://doi.org/10.2188/jea.je20140024> PMID: 24953134
17. Kim JS. Association between tinnitus and mental health among Korean adolescents: the Korea National Health and Nutrition Examination Survey. *Cent Eur J Public Health.* 2018; 26(1):65–70. <https://doi.org/10.21101/cejph.a4514> PMID: 29684301
18. Mahboubi H, Oliaei S, Kiumehr S, Dwabe S, Djalilian HR. The prevalence and characteristics of tinnitus in the youth population of the United States. *Laryngoscope.* 2013; 123(8):2001–8. <https://doi.org/10.1002/lary.24015> Epub 2013 Apr 18. PMID: 23606449
19. Marmut Z, Belojevic G, Backovic D, Zivojinovic JI, Tomanic M, Hadzic E. Tinnitus among Serbian secondary school students in relation to their behavior and habits. *Noise Health.* 2014; 16(69):73–8. <https://doi.org/10.4103/1463-1741.132080> PMID: 24804710
20. Savastano M. Characteristics of tinnitus in childhood. *Eur J Pediatr.* 2007; 166(8):797–801. <https://doi.org/10.1007/s00431-006-0320-z> Epub 2006 Nov 16. PMID: 17109163
21. Landalv D, Malmstrom L, Widen SE. Adolescents' reported hearing symptoms and attitudes toward loud music. *Noise Health.* 2013; 15(66):347–54. <https://doi.org/10.4103/1463-1741.116584> PMID: 23955132
22. Degeest S, Corthals P, Vinck B, Keppler H. Prevalence and characteristics of tinnitus after leisure noise exposure in young adults. *Noise Health.* 2014; 16(68):26–33. <https://doi.org/10.4103/1463-1741.127850> PMID: 24583677
23. Coelho CB, Sanchez TG, Tyler RS. Tinnitus in children and associated risk factors. *Prog Brain Res.* 2007; 166:179–91. [https://doi.org/10.1016/S0079-6123\(07\)66016-6](https://doi.org/10.1016/S0079-6123(07)66016-6) PMID: 17956782
24. Aksoy S, Akdogan O, Gedikli Y, Belgin E. The extent and levels of tinnitus in children of central Ankara. *Int J Pediatr Otorhinolaryngol.* 2007; 71(2):263–8. <https://doi.org/10.1016/j.ijporl.2006.10.008> Epub Nov 28. PMID: 17126917
25. Newman CW, Sandridge SA, Jacobson GP. Psychometric adequacy of the Tinnitus Handicap Inventory (THI) for evaluating treatment outcome. *J Am Acad Audiol.* 1998; 9(2):153–60. PMID: 9564679
26. Martinez C, Wallenhorst C, McFerran D, Hall DA. Incidence rates of clinically significant tinnitus: 10-year trend from a cohort study in England. *Ear Hear.* 2015; 36(3):e69–75. <https://doi.org/10.1097/AUD.000000000000121> PMID: 25470370
27. Bhatt IS. Prevalence of and Risk Factors for Tinnitus and Tinnitus-Related Handicap in a College-Aged Population. *Ear Hear.* 2018; 39(3):517–26. <https://doi.org/10.1097/AUD.0000000000000503> PMID: 29068861
28. Eley TC, Lichtenstein P, Stevenson J. Sex differences in the etiology of aggressive and nonaggressive antisocial behavior: results from two twin studies. *Child Dev.* 1999; 70(1):155–68. <https://doi.org/10.1111/1467-8624.00012> PMID: 10191520
29. Penner MJ. Linking spontaneous otoacoustic emissions and tinnitus. *Br J Audiol.* 1992; 26(2):115–23. <https://doi.org/10.3109/03005369209077879> PMID: 1628116
30. Williams W, Carter L. Tinnitus and leisure noise. *Int J Audiol.* 2017; 56(4):219–25. <https://doi.org/10.1080/14992027.2016.1250961> Epub 2016 Nov 16. PMID: 27849126
31. Kujawa SG, Liberman MC. Synaptopathy in the noise-exposed and aging cochlea: Primary neural degeneration in acquired sensorineural hearing loss. *Hear Res.* 2015; 330(Pt B):191–9. <https://doi.org/10.1016/j.heares.2015.02.009> Epub Mar 11. PMID: 25769437
32. Schaette R, McAlpine D. Tinnitus with a normal audiogram: physiological evidence for hidden hearing loss and computational model. *J Neurosci.* 2011; 31(38):13452–7. <https://doi.org/10.1523/JNEUROSCI.2156-11.2011> PMID: 21940438

33. Liberman MC, Epstein MJ, Cleveland SS, Wang H, Maison SF. Toward a Differential Diagnosis of Hidden Hearing Loss in Humans. *PLoS One*. 2016; 11(9):e0162726. <https://doi.org/10.1371/journal.pone.0162726> eCollection 2016. PMID: 27618300
34. Barbee CM, James JA, Park JH, Smith EM, Johnson CE, Clifton S, et al. Effectiveness of Auditory Measures for Detecting Hidden Hearing Loss and/or Cochlear Synaptopathy: A Systematic Review. *Semin Hear*. 2018; 39(2):172–209. <https://doi.org/10.1055/s-0038-1641743> Epub 2018 Jun 15. PMID: 29915454
35. Newman CW, Wharton JA, Jacobson GP. Self-focused and somatic attention in patients with tinnitus. *J Am Acad Audiol*. 1997; 8(3):143–9. PMID: 9188071
36. Genc GA, Muluk NB, Belgin E. The effects of tinnitus and/or hearing loss on the Symptom Checklist-90-Revised test. *Auris Nasus Larynx*. 2013; 40(2):154–61. <https://doi.org/10.1016/j.anl.2012.06.002> Epub Jul 22. PMID: 22824518
37. Sahin C, Aras HI, Yilmaz MS. Somatoform disorders in patients with chronic subjective tinnitus. *Eur Arch Otorhinolaryngol*. 2016; 273(11):3603–7. <https://doi.org/10.1007/s00405-016-3968-7> Epub 2016 Mar 16. PMID: 26984121
38. Langguth B, Hund V, Busch V, Jurgens TP, Lainez JM, Landgrebe M, et al. Tinnitus and Headache. *Biomed Res Int*. 2015; 2015:797416. <https://doi.org/10.1155/2015/797416> Epub 2015 Oct 25. PMID: 26583133
39. Tonndorf J. The analogy between tinnitus and pain: a suggestion for a physiological basis of chronic tinnitus. *Hear Res*. 1987; 28(2–3):271–5. [https://doi.org/10.1016/0378-5955\(87\)90054-2](https://doi.org/10.1016/0378-5955(87)90054-2) PMID: 2820913
40. Mandelli L, Petrelli C, Serretti A. The role of specific early trauma in adult depression: A meta-analysis of published literature. *Childhood trauma and adult depression*. *Eur Psychiatry*. 2015; 30(6):665–80. <https://doi.org/10.1016/j.eurpsy.2015.04.007> Epub Jun 13. PMID: 26078093
41. Lewis JE, Stephens SD, McKenna L. Tinnitus and suicide. *Clin Otolaryngol Allied Sci*. 1994; 19(1):50–4. <https://doi.org/10.1111/j.1365-2273.1994.tb01147.x> PMID: 8174302
42. Attanasio G, Russo FY, Roukos R, Covelli E, Cartocci G, Saponara M. Sleep architecture variation in chronic tinnitus patients. *Ear Hear*. 2013; 34(4):503–7. <https://doi.org/10.1097/AUD.0b013e31827bc436> PMID: 24005841
43. Zoger S, Svedlund J, Holgers KM. Relationship between tinnitus severity and psychiatric disorders. *Psychosomatics*. 2006; 47(4):282–8. <https://doi.org/10.1176/appi.psy.47.4.282> PMID: 16844885
44. Brunnberg E, Linden-Bostrom M, Berglund M. Tinnitus and hearing loss in 15-16-year-old students: mental health symptoms, substance use, and exposure in school. *Int J Audiol*. 2008; 47(11):688–94. <https://doi.org/10.1080/14992020802233915> PMID: 19031227
45. Deas D, Brown ES. Adolescent substance abuse and psychiatric comorbidities. *J Clin Psychiatry*. 2006; 67(7):e02. <https://doi.org/10.4088/jcp.0706e02> PMID: 17107227
46. statista. Enrollment rate in high school in South Korea from 2009 to 2018 2019 [cited 2019 April 2]. Available from: <https://www.statista.com/statistics/629024/south-korea-high-school-enrollment-rate/>.
